# Supplementary material
Source: PubMed Central journal article supplement (PMC5623151)

A

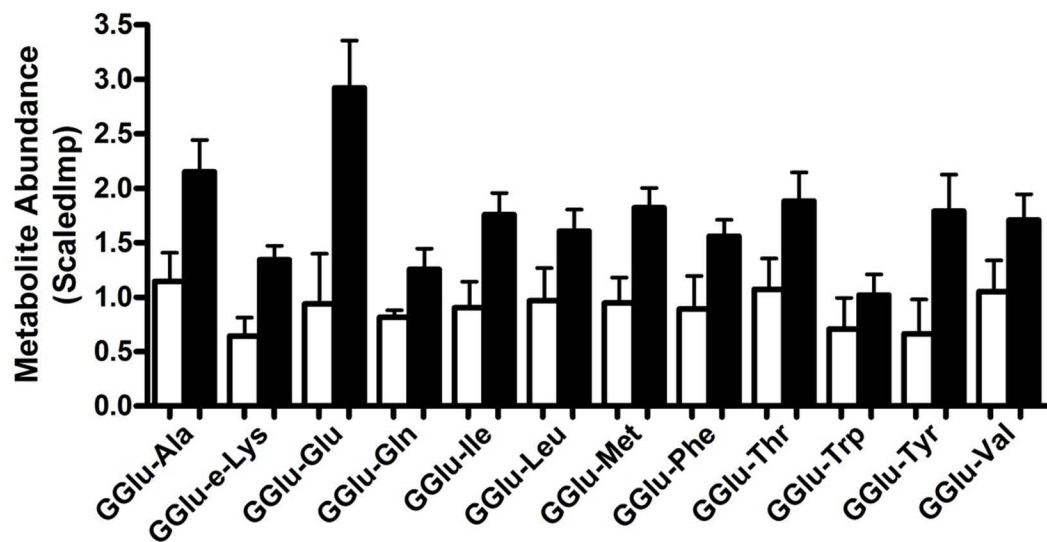

B

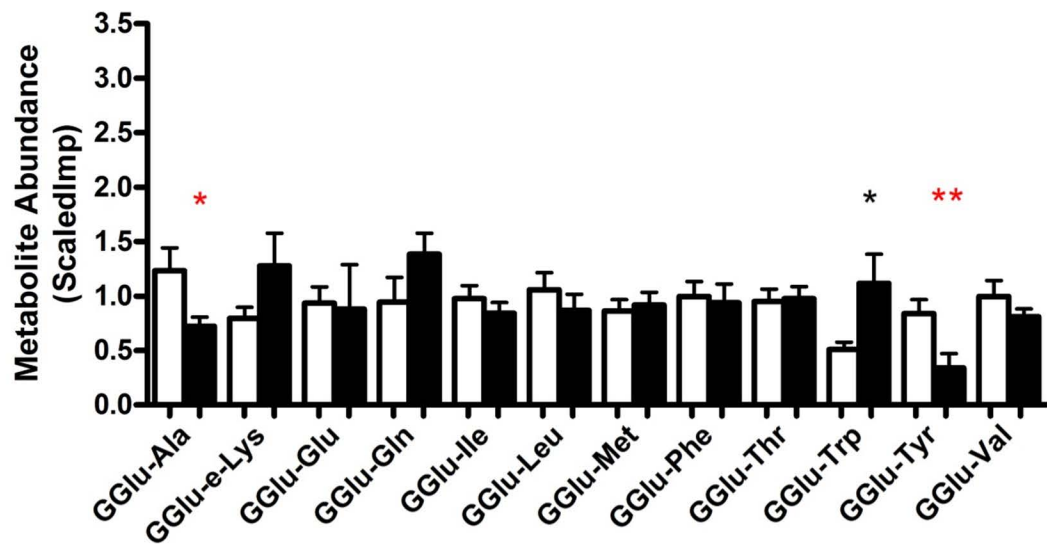

WT

 HLA-B27/ $\beta$ 2M

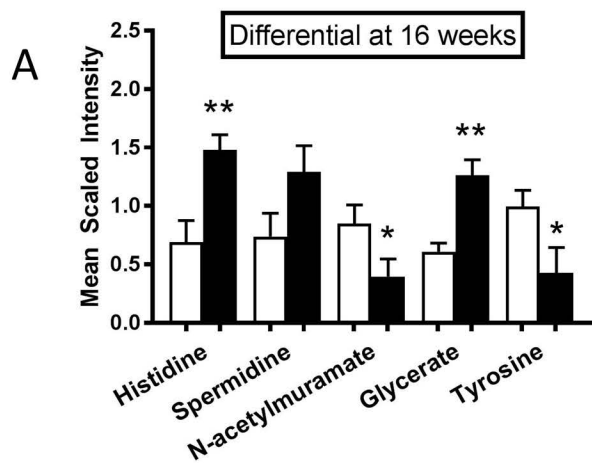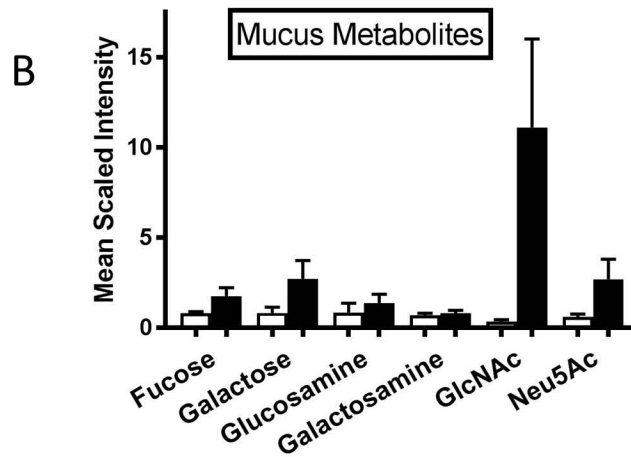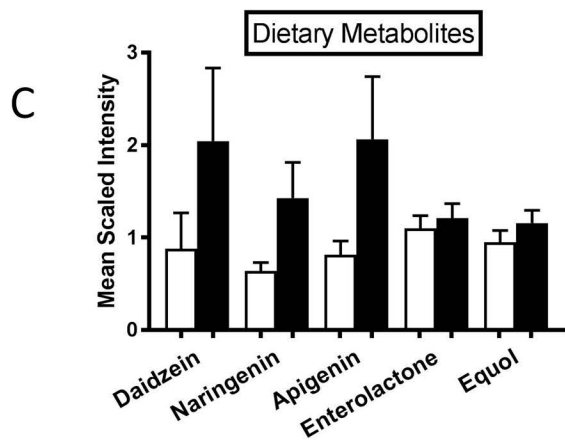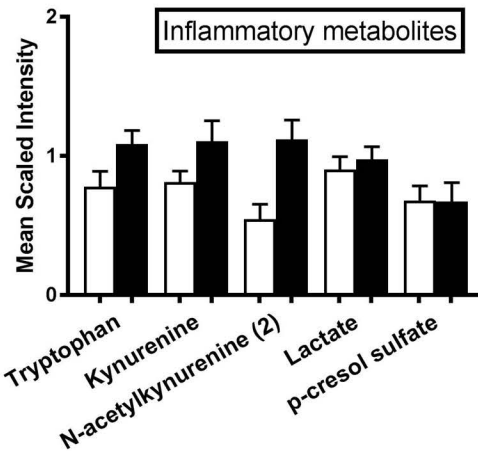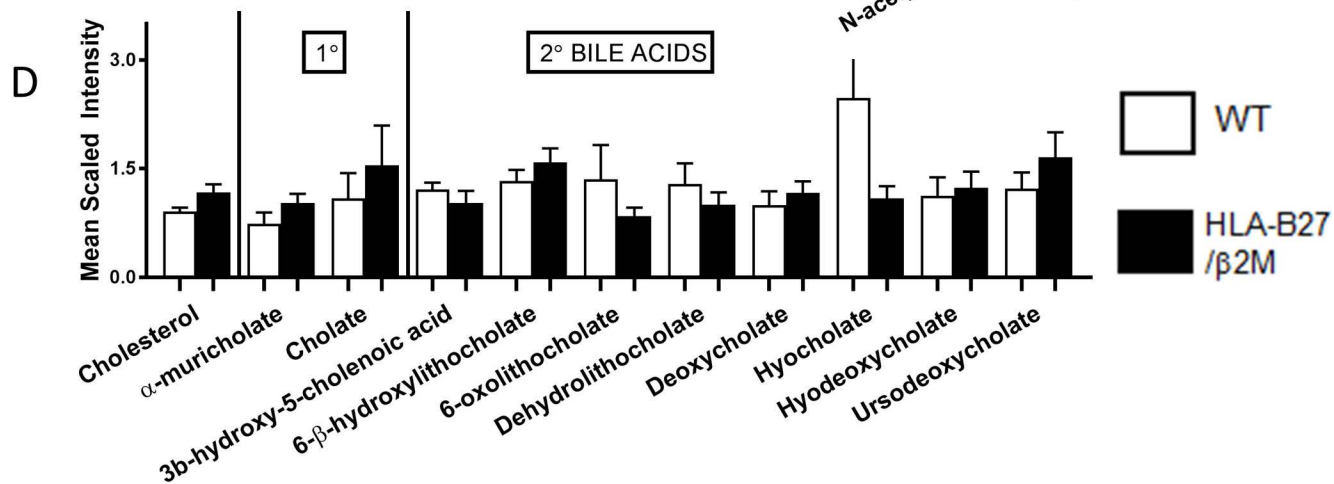

### Acetic Acid

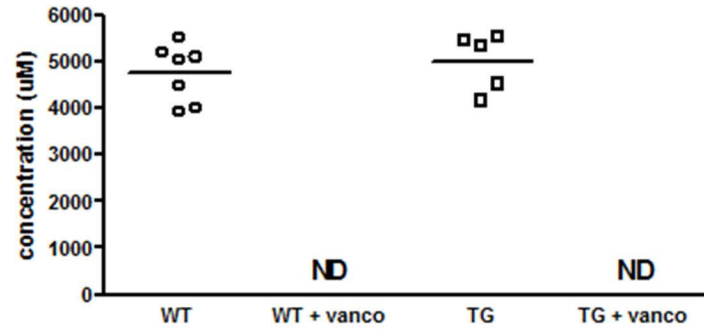

### Propionic Acid

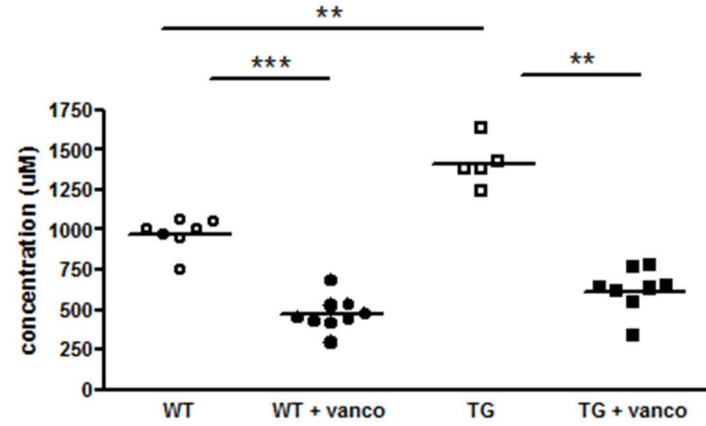

### Butyric Acid

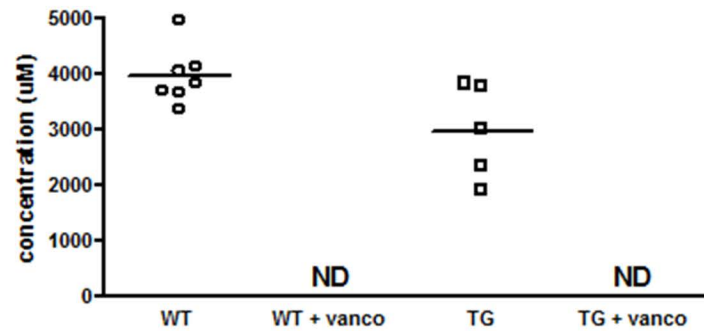

### Valeric Acid

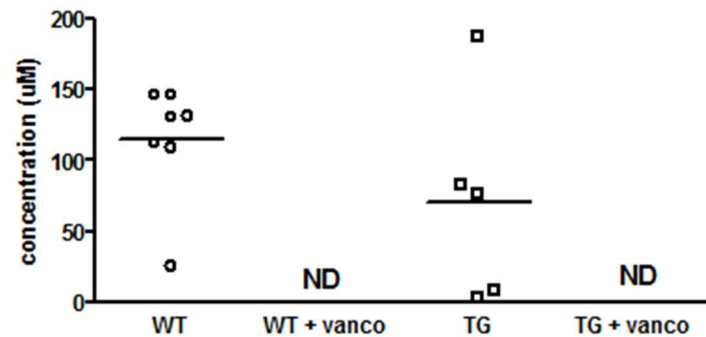

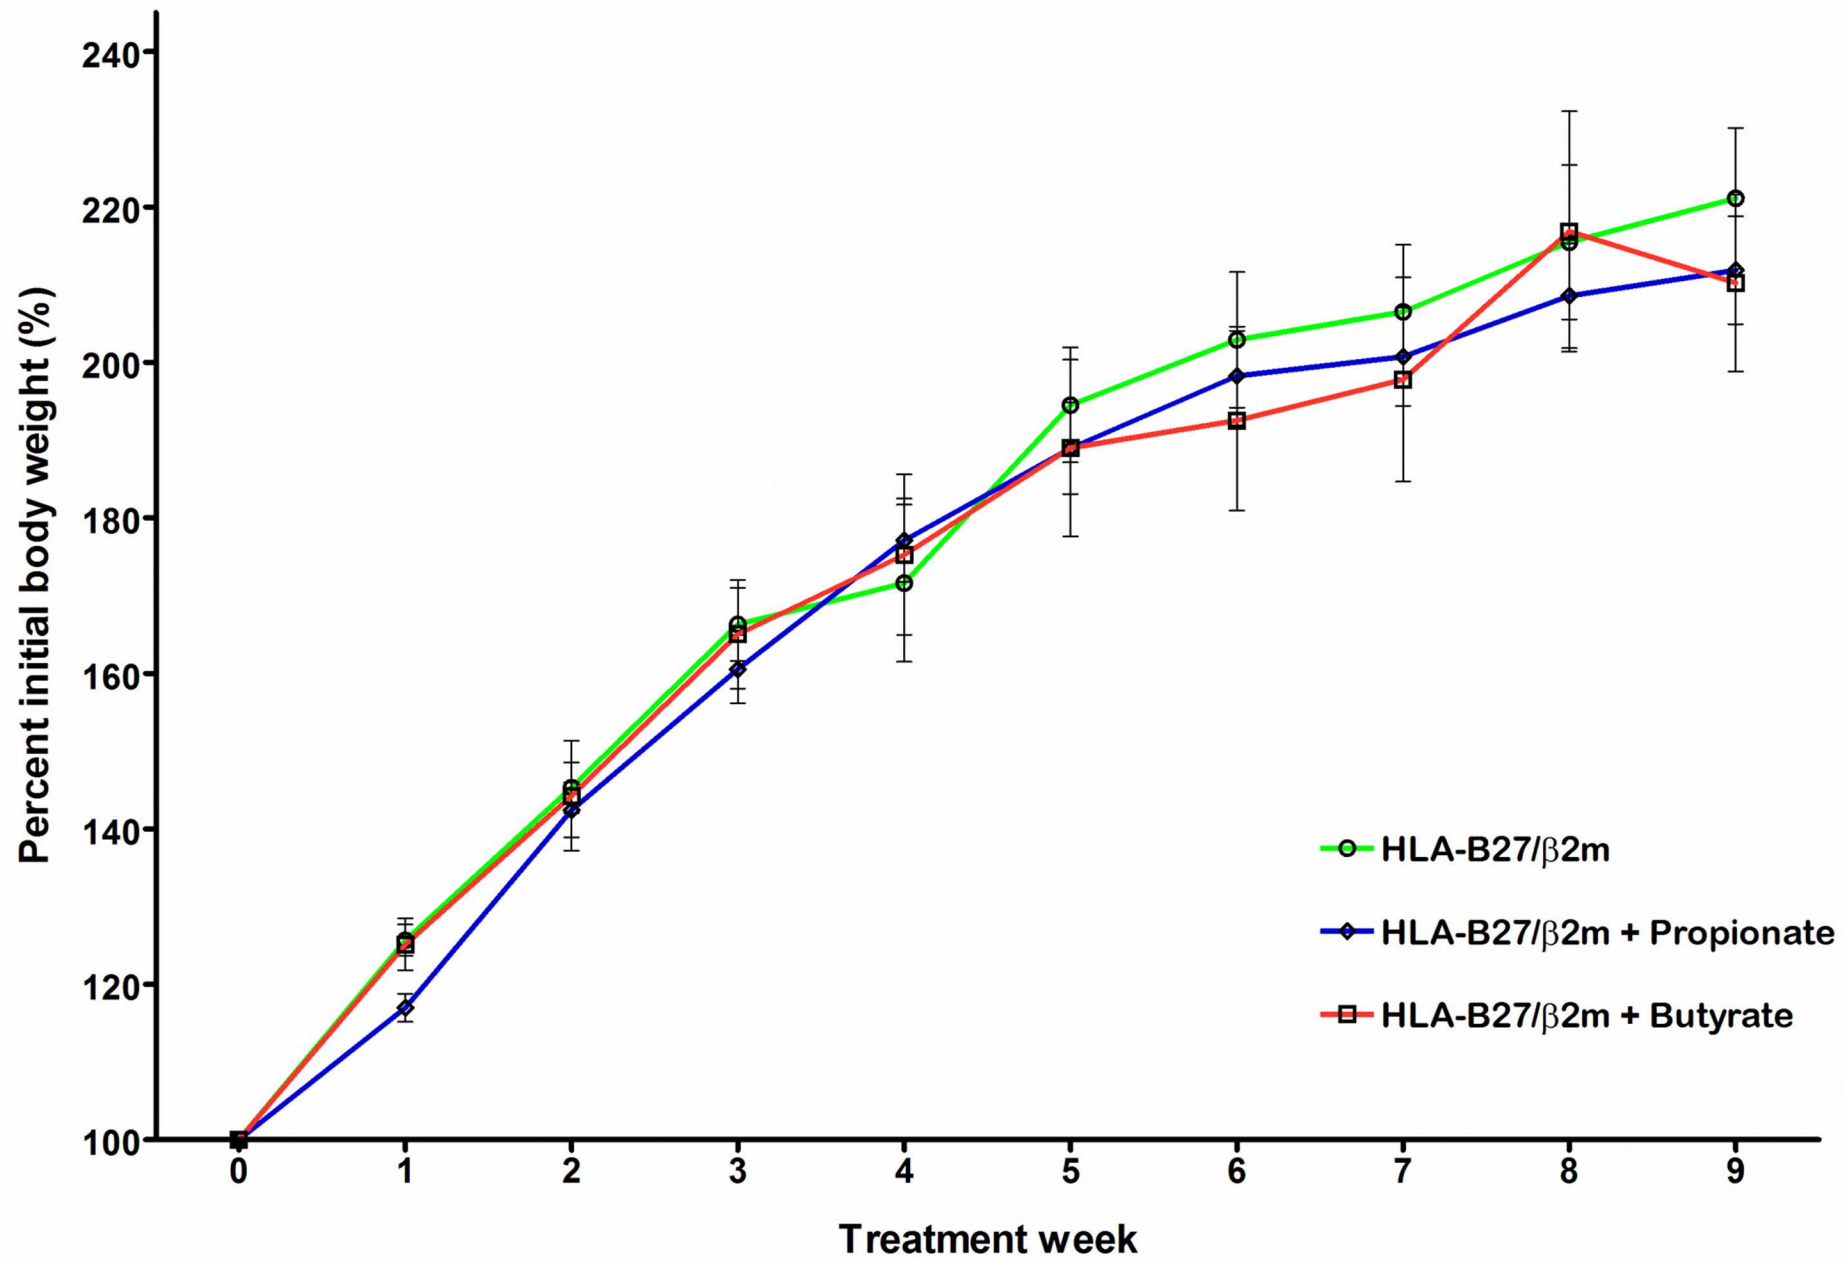

FoxP3

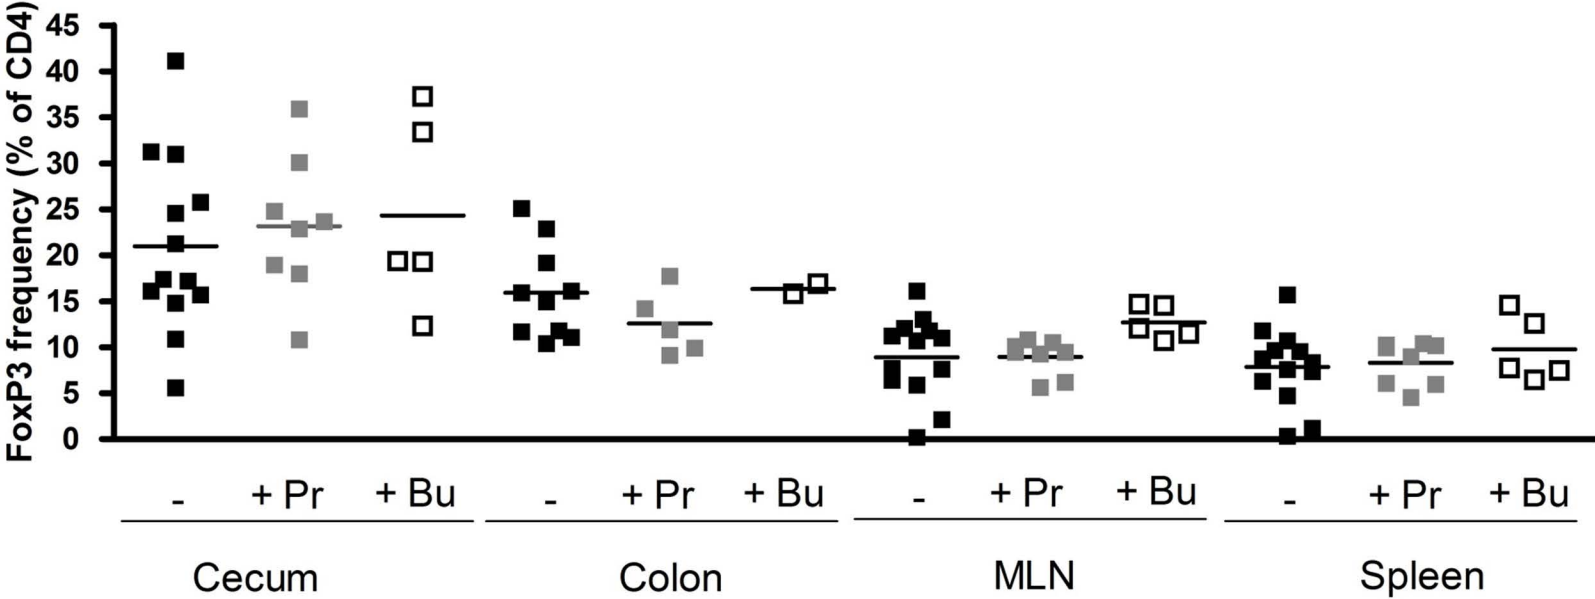

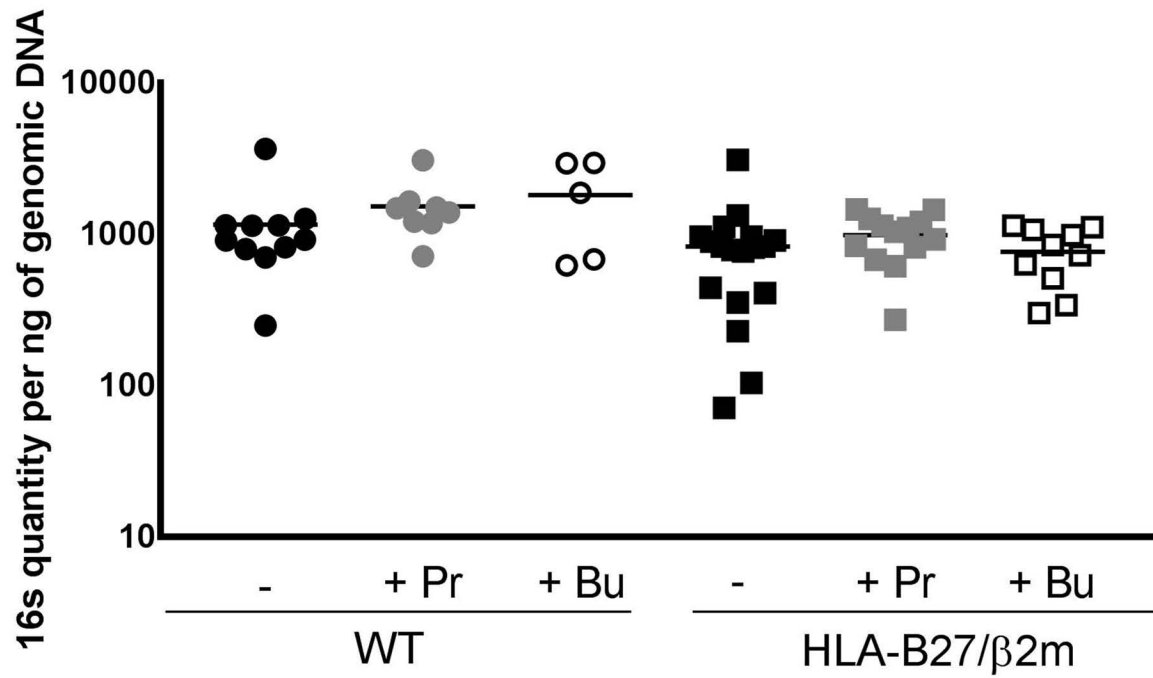

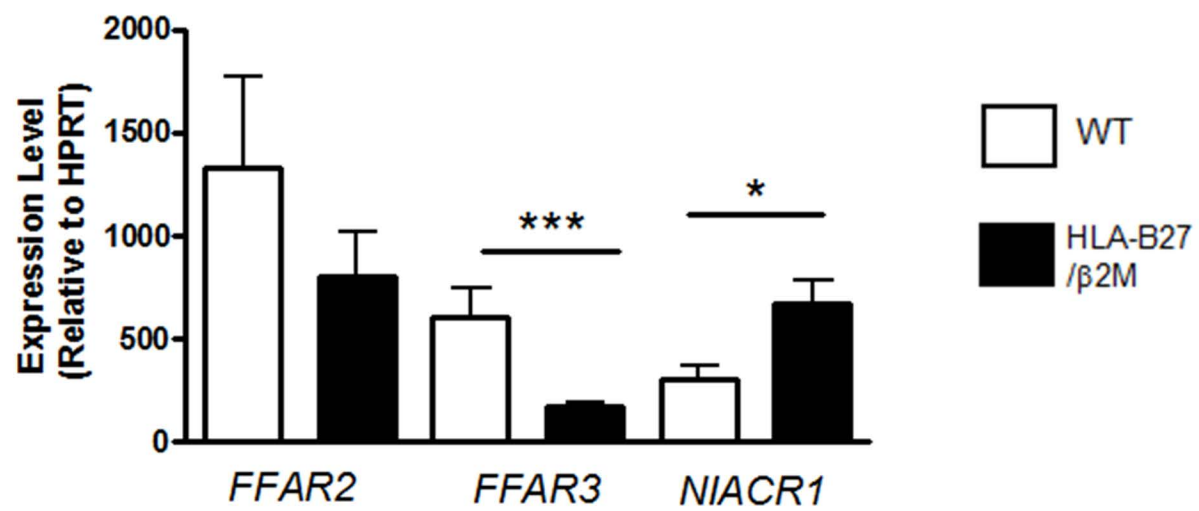

Supplement: NIHMS885564-supplement-Supp_FigS1-7.pdf [file NIHMS885564-supplement-Supp_FigS1-7.pdf]
